# Supplementary material for: Enhanced drought and heat stress tolerance of tobacco plants with ectopically enhanced cytokinin oxidase/dehydrogenase gene expression
Source: PubMed Central journal article supplement — J Exp Bot. 2013 May 13;64(10):2805–15. doi: 10.1093/jxb/ert131 (PMC3741687; doi:10.1093/jxb/ert131), 2013-05-13
Supplement: supp_ert131_jexbot093526_file001.pdf [file supp_ert131_jexbot093526_file001.pdf]

**Table S1.** Primers used for quantitative real-time RT-PCR. Sequences start at the 5' end.

| Gene product                       | Gene name       | Primer                | Sequence                     | Anneal. Temp. |
|------------------------------------|-----------------|-----------------------|------------------------------|---------------|
| Actin 9                            | <i>NtAct9</i>   | NtAct2A               | CTATTCTCCGCTTTGGACTTGGC<br>A | 60 °C         |
|                                    |                 | NtAct2B               | AGGACCTCAGGACAACGGAAAC<br>G  |               |
| Cytokinin oxidase/dehydrogenase    | <i>AtCKX1</i>   | fCKX1-510             | CACCTTTGGCAATTCTACAT         | 60 °C         |
|                                    |                 | rCKX1-510             | TGTCCTTGAAGCGAGTGA           |               |
| Dehydrin                           | <i>NtERD10B</i> | DehF2                 | ATGGACAAGGCGGAAGAAG          | 58 °C         |
|                                    |                 | DehR2                 | GTTGTTGCAGTTGAATGAGT         |               |
| 1-pyrroline-5-carboxylate synthase | <i>NtP5CS A</i> | Nt<br>P5CS_A_for1     | CTGGAGGCTCGAGTGTAATG         | 60°C          |
|                                    |                 | Nt<br>P5CS_A_rev<br>1 | TAGTTGTCCTGCCCTTGTC          |               |

**Table S2.** The content of xanthophyll cycle pigments and DEPS during drought stress progression and subsequent recovery.

| Pigments [mg cm <sup>-2</sup> ] |                | Control     | 1 d drought | 6 d drought | 11 d drought | Recovery    |
|---------------------------------|----------------|-------------|-------------|-------------|--------------|-------------|
| <b>V+A+Z</b>                    | <b>WT</b>      | 0.56± 0.041 | 0.73± 0.064 | 0.95± 0.067 | 1.06± 0.079  | 0.72± 0.041 |
|                                 | <b>W6:CKX</b>  | 0.53± 0.027 | 0.71± 0.081 | 0.90± 0.048 | 1.10± 0.082  | 0.77± 0.079 |
|                                 | <b>35S:CKX</b> | 0.63± 0.033 | 0.78± 0.039 | 0.91± 0.081 | 1.13± 0.067  | 0.84± 0.036 |
| <b>DEPS</b>                     | <b>WT</b>      | 0.23± 0.011 | 0.28± 0.039 | 0.36± 0.011 | 0.37± 0.014  | 0.26± 0.013 |
|                                 | <b>W6:CKX</b>  | 0.24± 0.022 | 0.30± 0.027 | 0.37± 0.017 | 0.40± 0.017  | 0.23± 0.012 |
|                                 | <b>35S:CKX</b> | 0.22± 0.013 | 0.26± 0.012 | 0.30± 0.012 | 0.35± 0.018  | 0.21± 0.019 |

Xanthophyll cycle pigments (V, violaxanthin; A, antheraxanthin; and Z, zeaxanthin) were determined in wild-type and *CKX1* transgenic tobacco plants. DEPS represents the ratio of de-epoxidated xanthophyll cycle pigments to their total sum. WT, wild-type.

**Figure S1.** Photos of wild-type and *CKXI* transgenic tobacco plants under control (well-watered) conditions and after 10-day drought.

**Figure S2.** Content of cytokinin metabolites in leaves and roots of wild-type and *CKXI* transgenic tobacco plants. Control - control (hydrated) conditions; D - drought stress (10-d dehydration); D + HS – combined drought and heat stress (10 d dehydration + 40°C for 2 h), D recovery – 24 h recovery following rehydration; D+HS recovery – 24 h recovery after combined stress, 2 h HS - heat stress (40°C for 2 h); 6 h HS - heat stress (40°C for 6 h). Cytokinin metabolites were grouped according to their structure and function into 5 groups: P - cytokinin phosphates (*trans*-zeatin riboside-, isopentenyladenosine- and dihydrozeatin riboside phosphates), O-glc - cytokinin O-glucosides [*trans*-zeatin(riboside) O-glucoside and dihydrozeatin(riboside) O-glucoside], N-glc - cytokinin N-glucosides (7N- and 9N-glucosides of *trans*-zeatin, isopentenyladenine and dihydrozeatin), *cisZ*(MP,R) - *cis*-zeatin /riboside/phosphate, *cisZ* glc - *cisZ*-glucosides [*cis*-zeatin (riboside) O-glucoside and 7N- and 9N-glucoside]. WT, wild type. UL, upper leaves, LL, lower leaves, R, roots.

**Figure S3.** Transcript levels of the *P5CSA* gene in leaves and roots of wild-type and *CKXI* transgenic tobacco plants. Details for designation of individual variants are as described in Fig. 1. WT, wild-type.

**Figure S4.** Chlorophyll content of individual leaves of wild-type and *CKXI* transgenic tobacco plants under control (well-watered) conditions and after 6-day drought. The leaves were numbered from the bottom to the top. WT, wild-type.

**Figure S5.** Content of abscisic acid metabolites (phaseic acid, ABA-glucosylester, dihydrophaseic acid and neophaseic acid) in leaves and roots of wild-type and *CKXI* transgenic tobacco plants. Control - control (hydrated) conditions; D - drought stress (10-d dehydration); D + HS – combined drought and heat stress (10 d dehydration + 40°C for 2 h), D recovery – 24 h recovery following rehydration; D+HS recovery – 24 h recovery after combined stress, 2 h HS - heat stress (40°C for 2 h); 6 h HS - heat stress (40°C for 6 h). WT, wild type. UL, upper leaves, LL, lower leaves, R, roots.

**Figure S6.** Thermal images of tobacco wild-type and *CKX1* transgenic tobacco plants exposed 40°C. A - immediately after transfer to 40°C, B – after 10 min at 40°C, C - after 20 min at 40°C.

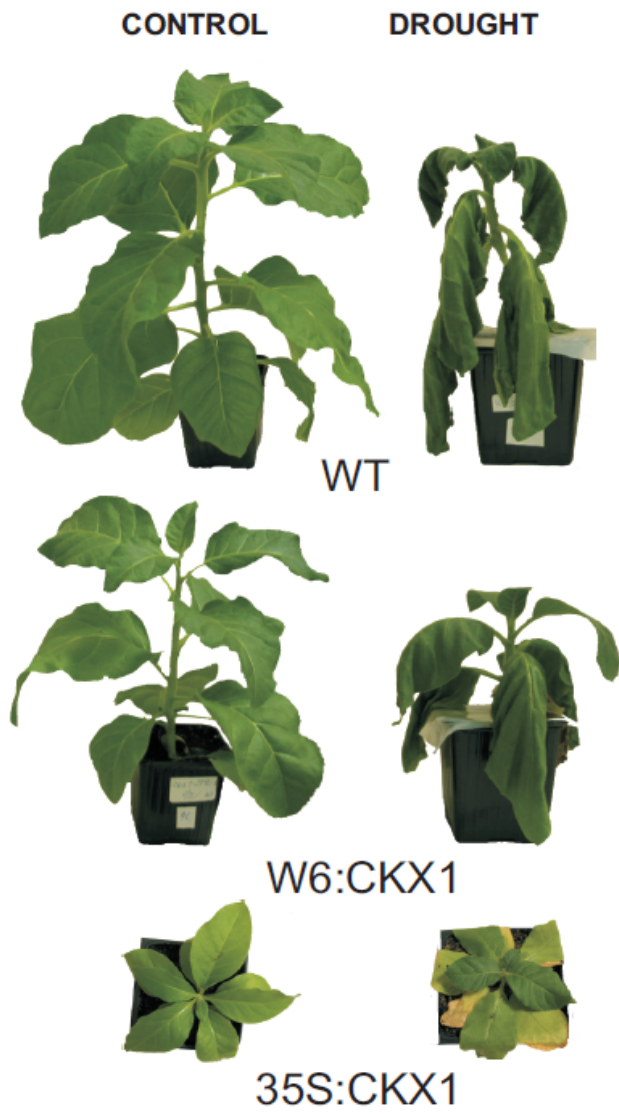

**Figure S1**

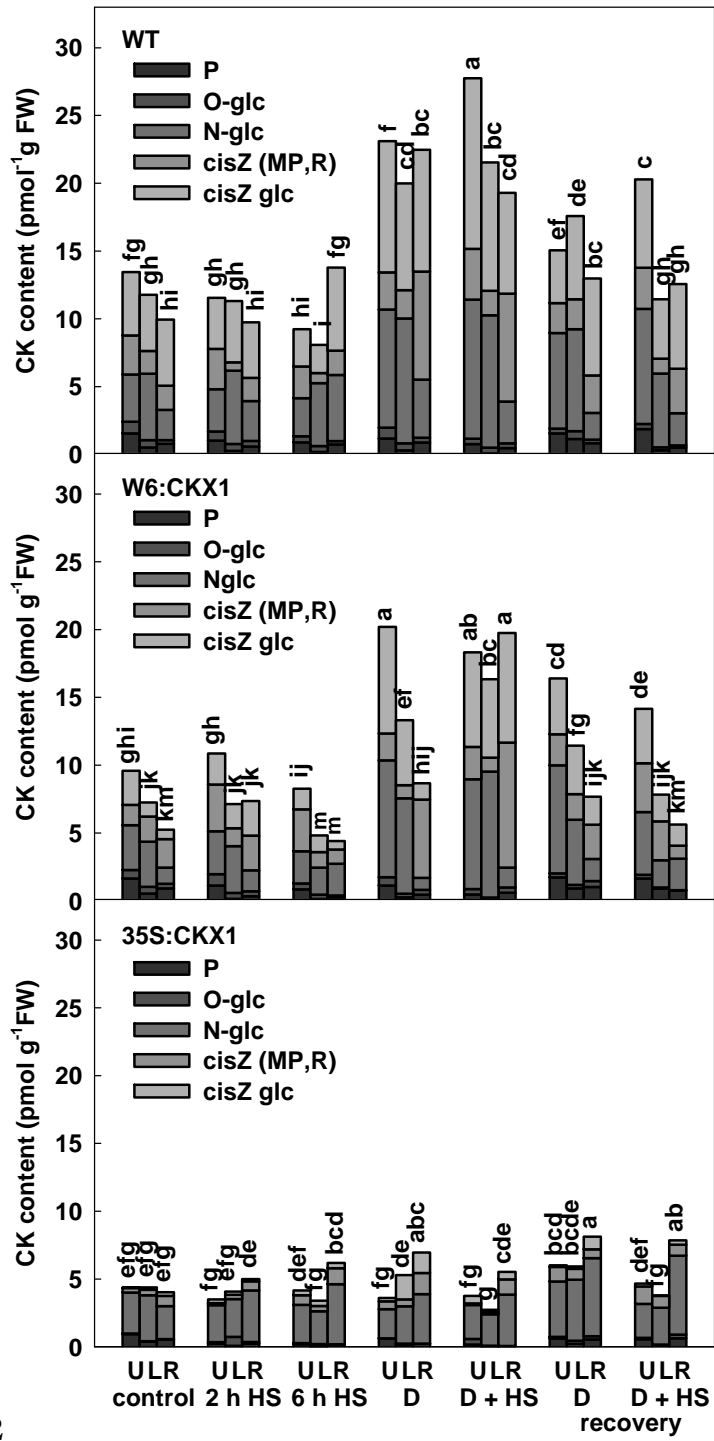

Figure S2

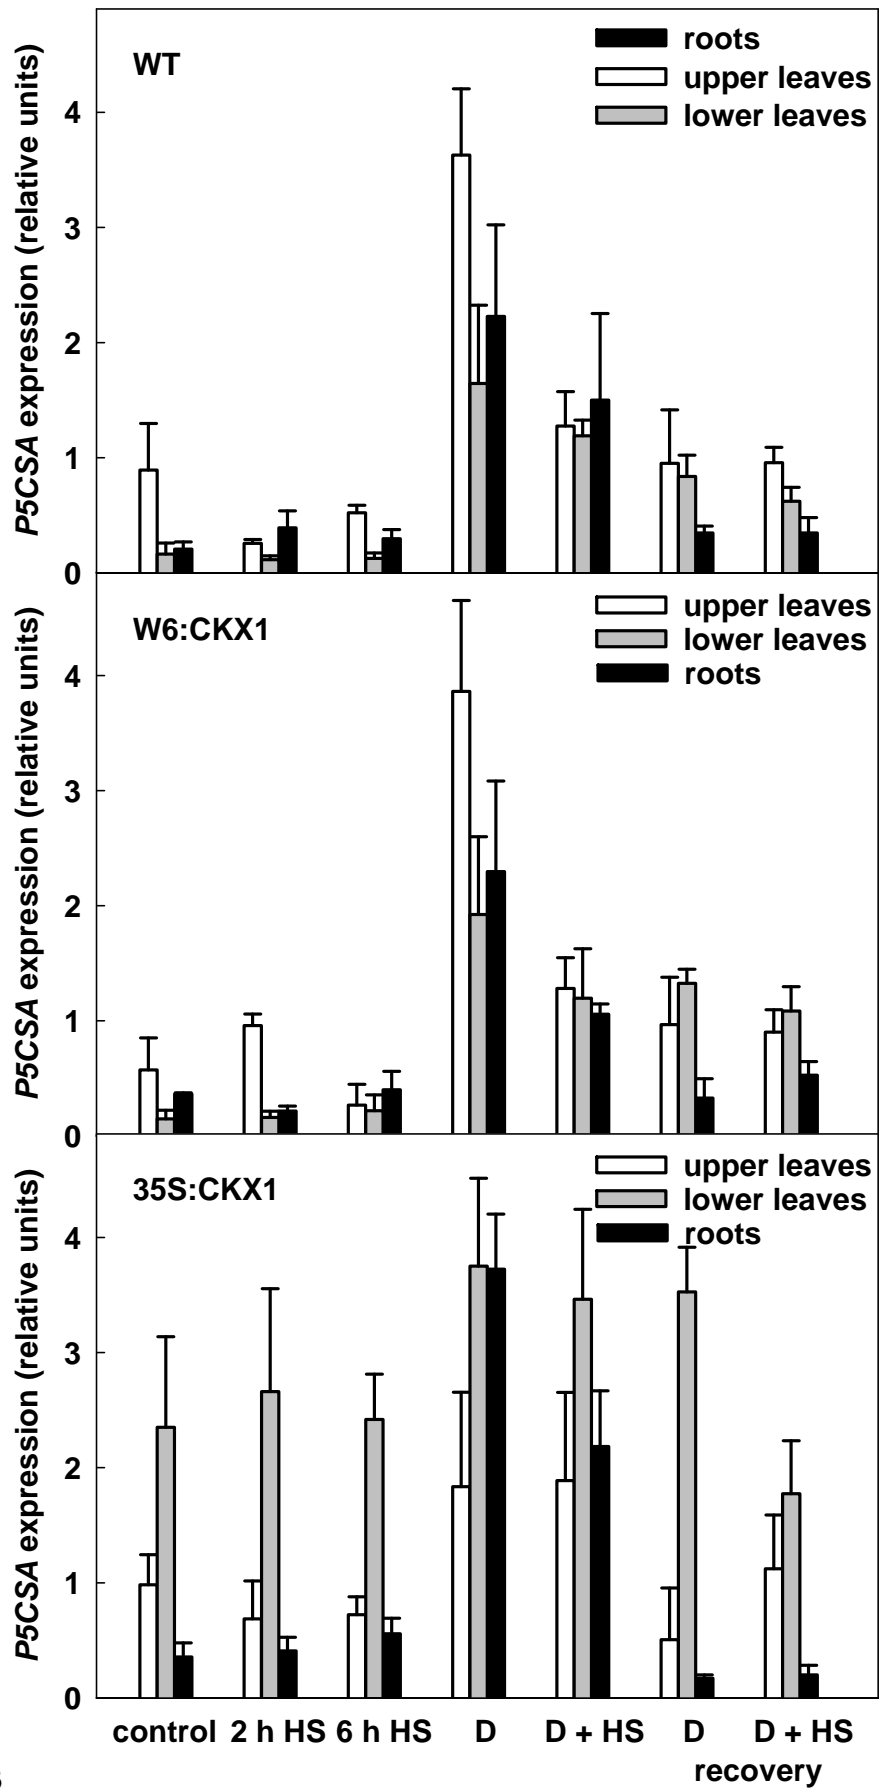

Figure S3

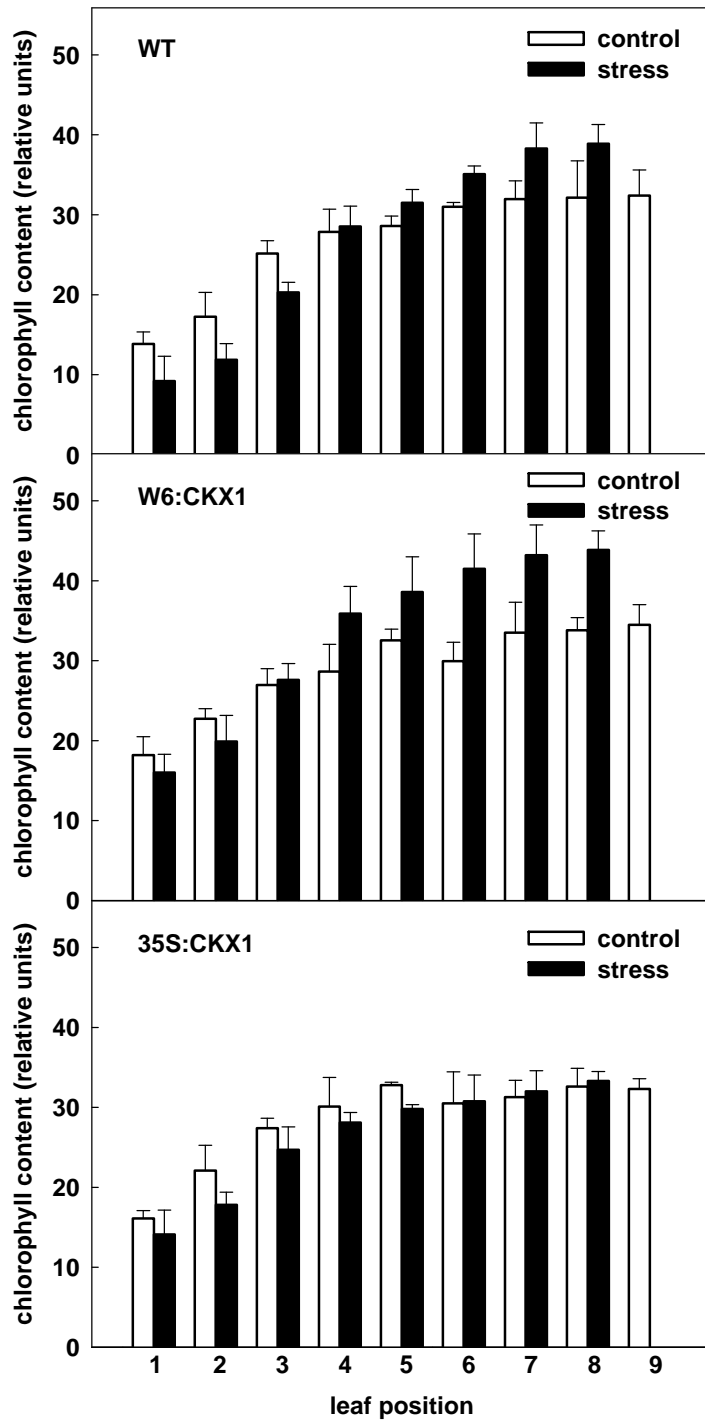

Figure S4

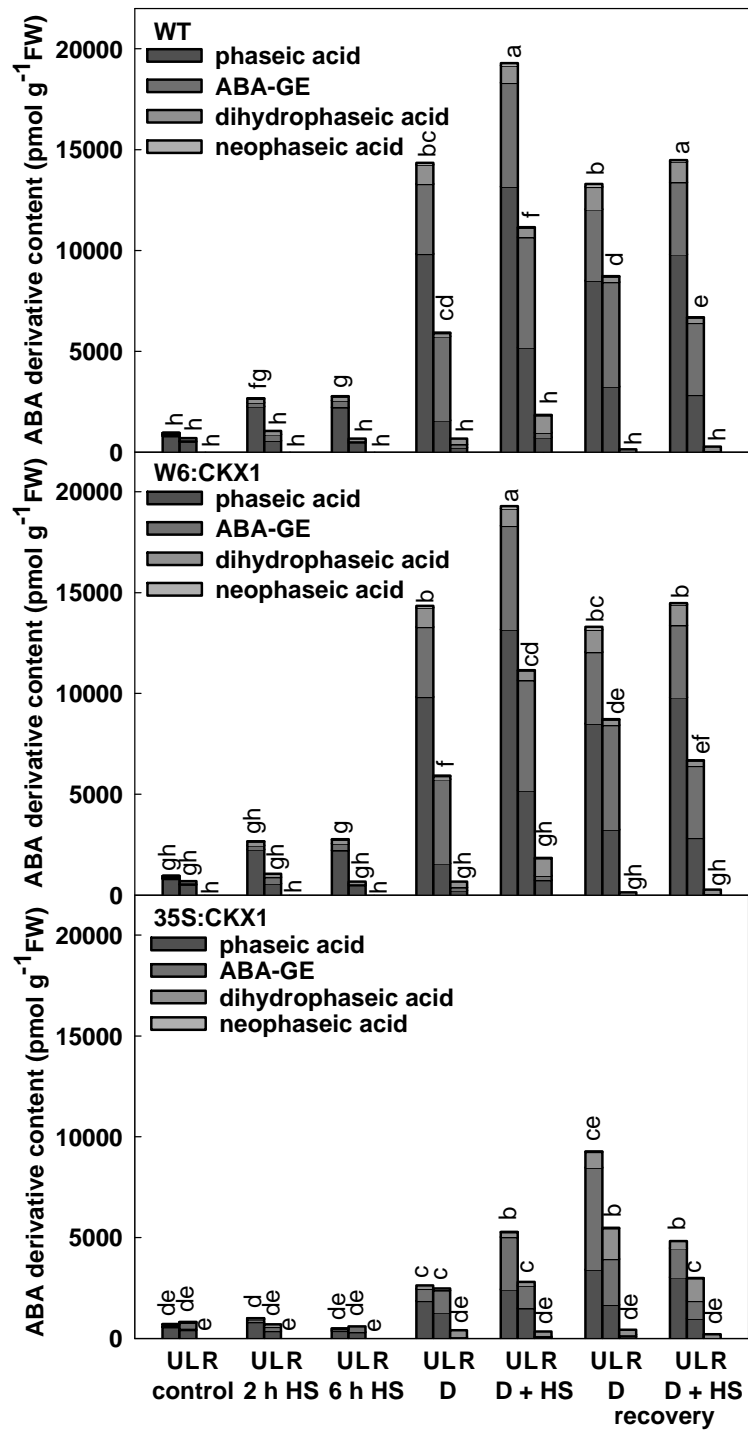

Figure S5



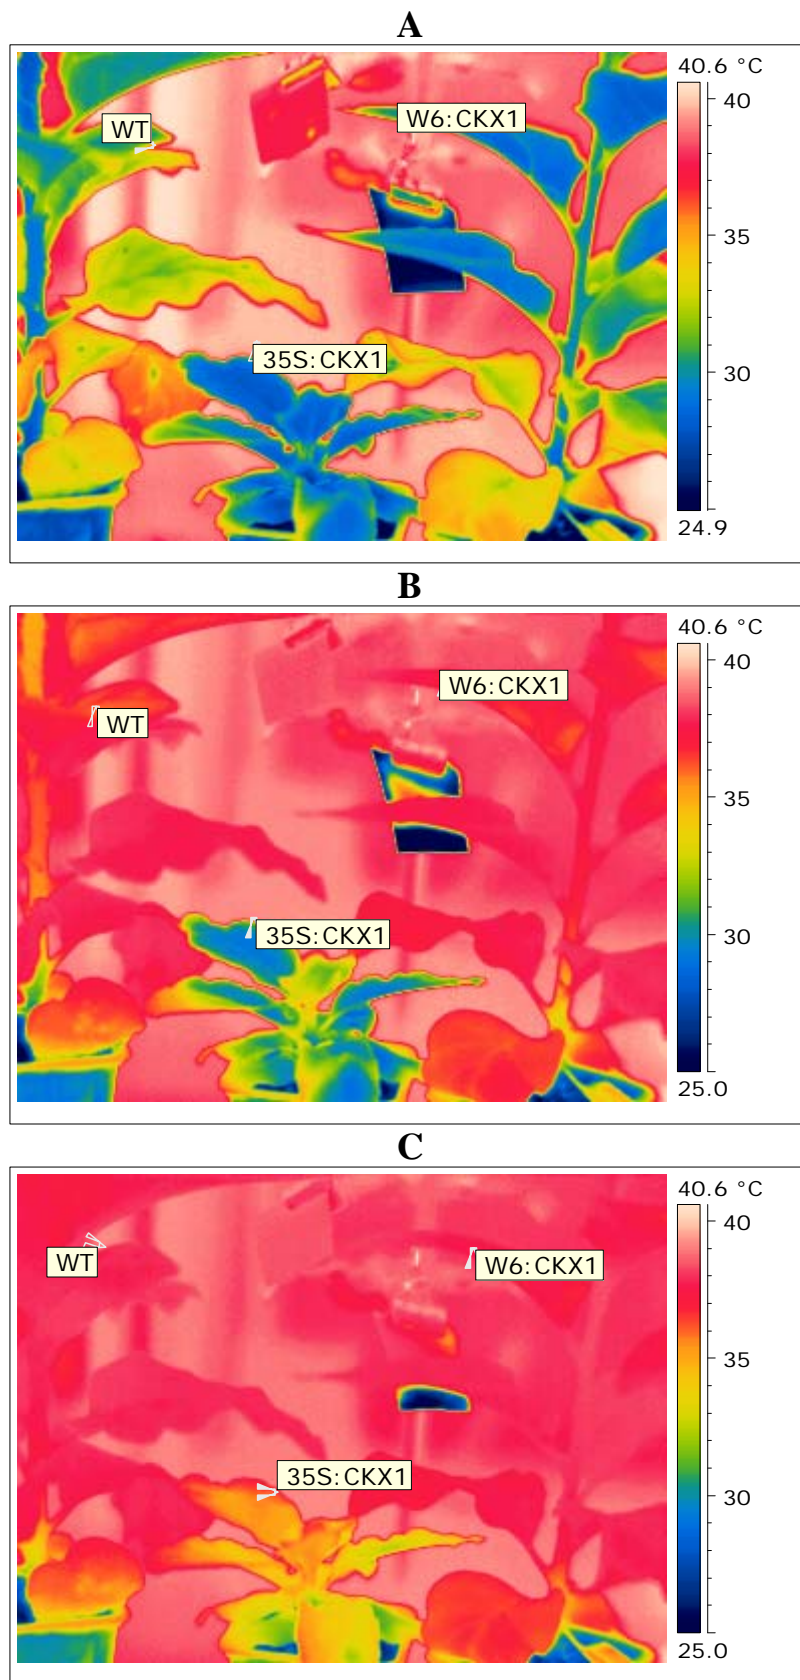

**Figure S6**
